# Supplementary material for: Investigating the Molecular Mechanisms of Renal Hepcidin Induction and Protection upon Hemoglobin-Induced Acute Kidney Injury
Source: MDPI journal article supplement (doi:10.3390/ijms23031352), 2022-01-25
Supplement: s1 [file s1]

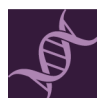

## Supplementary Material

**Supplementary Table S1.** Primary and secondary antibodies used for immunoblotting.

| Protein        | Primary Antibody    | Dilution  | Secondary Antibody       | Dilution |
|----------------|---------------------|-----------|--------------------------|----------|
| Nrf2           | Abcam 31163         | 1:500     | Invitrogen A21109        | 1:20,000 |
| NQO1           | Abcam 34173         | 1:1000    | Invitrogen A21109        | 1:20,000 |
| $\beta$ -actin | Sigma A5441         | 1:100,000 | Rockland 21031           | 1:20,000 |
| Histone H3     | Abcam 24834         | 1:1000    | Rockland 21031           | 1:20,000 |
| IL-6R $\alpha$ | R&D Research AF1830 | 1:500     | Thermo Fischer<br>A27020 | 1:1000   |

**Supplementary Table S2.** Primers used for genotyping.

| Gene                         | Forward primer (5'-3')                   | Reverse primer (5'-3')                    |
|------------------------------|------------------------------------------|-------------------------------------------|
| <i>Cre</i>                   | GCATAACCAGTGAAACAGCATTGCTG               | GGACATGTTTCAGGGATCGCCAGGCG                |
| <i>rtTA</i>                  | AATCGAGATGCTGGACAGGCATCAT-<br>ACCCA      | GGCATAGAATCGGTGGTAGGTGTCTCTCTT            |
| <i>LacZ</i>                  | TTC ACT GGC CGT CGT TTTACAACG TCG<br>TGA | ATG TGA GCG AGTAAC AAC CCG TCG GAT<br>TCT |
| <i>Hamp</i><br><i>floxed</i> | GGT GTC TAG GTT TTT TAC CCT              | GAA GGC AAA GGC AAA TGA TC                |
| $\beta$ -ac-<br><i>tin</i>   | GCTATGCTCTCCCTCACGCCA                    | CTCTTTGATGTCACGCACGAT                     |

**Supplementary Table S3.** Primers used for PCR after DNA isolation.

| Gene        | Forward primer (5'-3') | Reverse primer (5'-3') |
|-------------|------------------------|------------------------|
| <i>Hamp</i> | GAAGGCAAAGGCAAATGAT    | GCAGCACCACTATCTCCAT    |
| <i>HPRT</i> | GCTGGTGAAAAGGACCTCTCG  | CCACAGGACTAGAACACCTGC  |

**Supplementary Table S4.** Primers used for quantitative PCR.

| <b>Gene</b>       | <b>Forward primer (5'-3')</b> | <b>Reverse primer (5'-3')</b> |
|-------------------|-------------------------------|-------------------------------|
| <i>β-actin</i>    | GCTATGCTCTCCCTCAC-GCCA        | CTCTTTGATGTCACGCAC-GAT        |
| <i>HPRT</i>       | GCTGGTGAAAAGGAC-CTCTCG        | CCACAGGACTAGAACAC-CTGC        |
| <i>Hamp1</i>      | TTGCGATAC-CAATGCAGAAG         | GGATGTGGCTCTAGGC-TATGTT       |
| <i>HO-1</i>       | CCTCACTGGCAG-GAAATCAT         | CCAGAG-TGTTCAATCGAGCA         |
| <i>Keap1</i>      | ACGTCCTCGGAGGC-TATGAT         | GGGTCACCTCAC-TCCAGGTA         |
| <i>GCLM</i>       | AGTTGACATGG-CATGCTCCG         | CCATCTTCAATCG-GAGGCGA         |
| <i>TXNRD1</i>     | CAGCCCTGAA-GCCGAACAAA         | GTCATAGGACCCAGGGG-GAT         |
| <i>NQO1</i>       | GGTAGCGGCTCCATGTACTC          | CGCAGGATGCCAC-TCTGAAT         |
| <i>L-ferritin</i> | GAAACTCATCAAGAA-GATGGGCA      | GCTGGTTGTGGCCCCGC             |
| <i>IL-6</i>       | GAGGATACCAC-TCCCAACAGACC      | AAGTGCATCATCGTT-GTTCATACA     |
| <i>TfR1</i>       | CGCTTTGGGTGCTGGTG             | GGG-CAAGTTTCAACAGAA-GACC      |
